# Supplementary material
Source: PubMed Central journal article supplement (PMC7844693)
Supplement: jamaophthalmol-e206089-s001.pdf [file jamaophthalmol-e206089-s001.pdf]

## Supplemental Online Content

Smirnov VM, Nassisi M, Hernandez CS, et al. Retinal phenotype of patients with isolated retinal degeneration due to *CLN3* pathogenic variants in a French retinitis pigmentosa cohort. *JAMA Ophthalmol*. Published online January 28, 2021.  
doi:10.1001/jamaophthalmol.2020.6089

### **eMethods.**

**eFigure 1.** Pedigrees

**eFigure 2.** qPCR for ex.8\_ex.9 del

**eFigure 3.** Mild forms of *CLN3* isolated retinal degeneration

**eFigure 4.** Severe forms of *CLN3* isolated retinal degeneration

**eFigure 5.** Full-field ERG

**eFigure 6.** BCVA progression

**eFigure 7.** CIC03517, progression

**eFigure 8.** CIC00350, progression

**eFigure 9.** CIC01170, progression

**eFigure 10.** CIC01169, progression

**eFigure 11.** CIC01168, progression

**eFigure 12.** 1037229, progression

**eFigure 13.** CIC09088, progression

**eFigure 14.** Battenin

**eTable.** *CLN3* variants reported both in JNCL and isolated retinal degeneration

### **eReferences.**

This supplementary material has been provided by the authors to give readers additional information about their work.

## **eMethods.**

**Genetic analysis.** Blood samples from the index cases and, when possible, relatives were collected for genetic research and genomic DNA was extracted as previously reported <sup>1</sup>. These DNA samples were collected within the NeuroSensCol DNA bank, for research in neuroscience (PI: JA Sahel, co-PI I Audo, partner with CHNO des Quinze-Vingts, Inserm and CNRS). Targeted next generation sequencing (NGS) was performed in all but one family in collaboration with an external company (IntegraGen, Evry, France). A large panel of genes (200-300) known or presumed to be associated with retinal dystrophies was used for targeted NGS as previously described <sup>2,3</sup>. In a family F1517 (eFigure 1), WES was performed in the trio (proband and parents): exons and flanking exonic regions of DNA samples were captured and investigated with in-solution enrichment methodology (SureSelect Clinical Research Exome, Agilent, Massy, France) as reported previously <sup>4(p179)</sup>. Image analysis and base calling were performed with Real Time Analysis software (Illumina). For all subjects of the family, overall WES coverage of the captured regions was 96% and 90.67% for 10x and 25x depth of coverage respectively resulting in a mean sequencing depth of 82x per base. Genetic variation annotations were performed by an in-house pipeline (IntegraGen), and results were provided per sample or family in tabulated text files. Stringent filtering criteria were used to select most likely pathogenic variant(s): only nonsense, missense, splice site variants or small deletions or insertions (InDels) with a minor allelic frequency  $\leq 0.005$  in Exome Variants Server (EVS, <http://evs.gs.washington.edu/EVS/>), HapMap (<http://hapmap.ncbi.nlm.nih.gov/>), 1000Genomes (<http://www.1000genomes.org/>) and Genome Aggregation Database (GnomAD, <http://gnomad.broadinstitute.org/>) were considered to be putative disease-causing. If never reported, variant pathogenicity was predicted with bioinformatic tools: Polymorphism Phenotyping v.2 (PolyPhen2, <http://genetics.bwh.harvard.edu/pph2/>), Sorting Intolerant From Tolerant (SIFT, <http://sift.jcvi.org/>), MutationTaster (<http://www.mutationtaster.org/>) and

amino acid conservation across species was studied with UCSC Genome Browser (<http://genome.ucsc.edu/index.html>; Human GRCh38/hg38 Assembly).

The *CLN3* variants selected after targeted NGS/WES were validated in the index cases and relatives by Sanger sequencing (refseq: NM\_001042432.1, primer sequence available on demand). Quantitative polymerase chain reaction (qPCR) was performed to validate the common ex.8\_ex.9 1.02kb deletion detected as a copy number variant (CNV) by NGS/WES (eFigure 2).

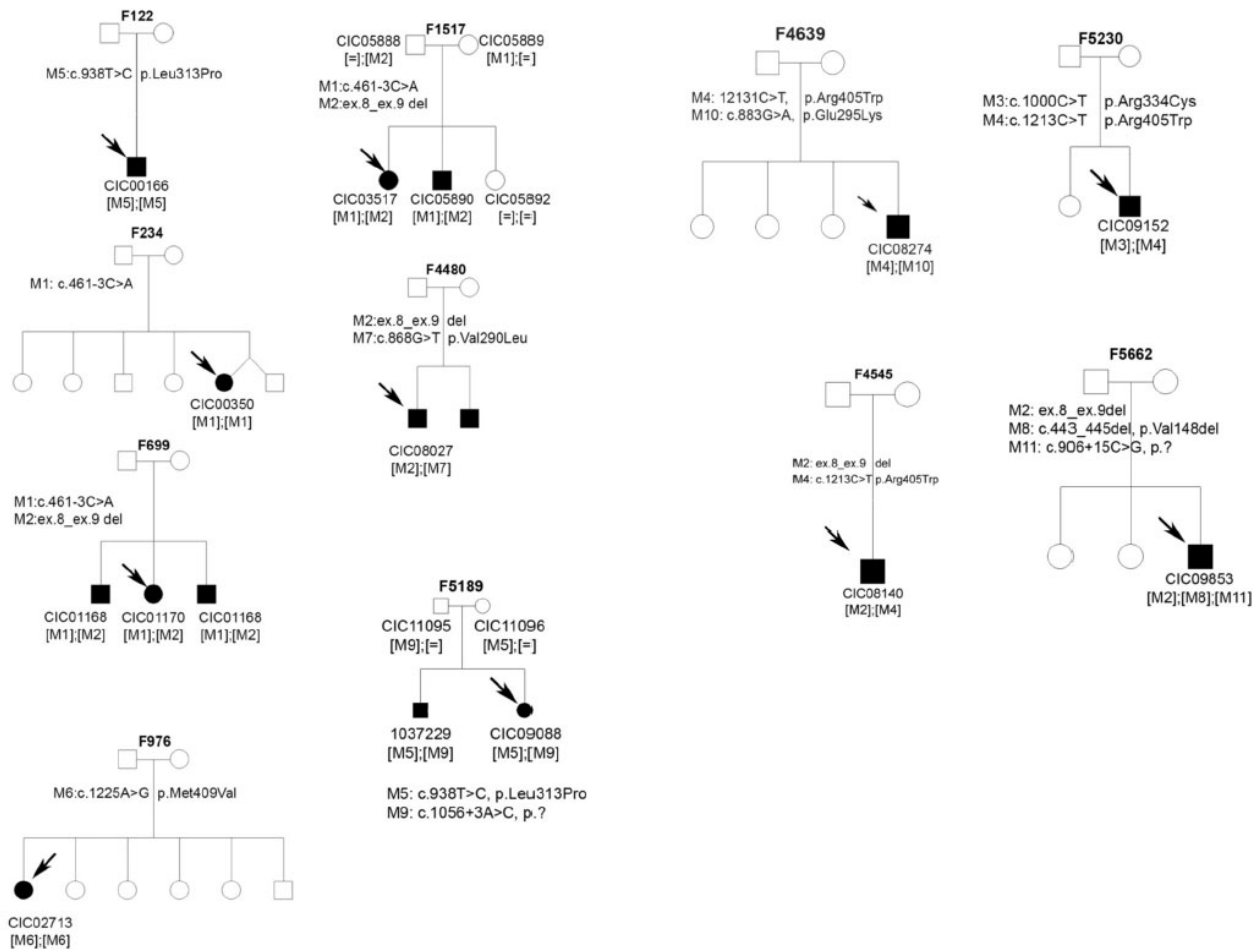

**Figure 1. Pedigrees.** 15 patients from 11 unrelated families harbored biallelic pathogenic variants in *CLN3*.

Normalized Relative Quantity Exon 8 and 9/Exon10  
Family 1517

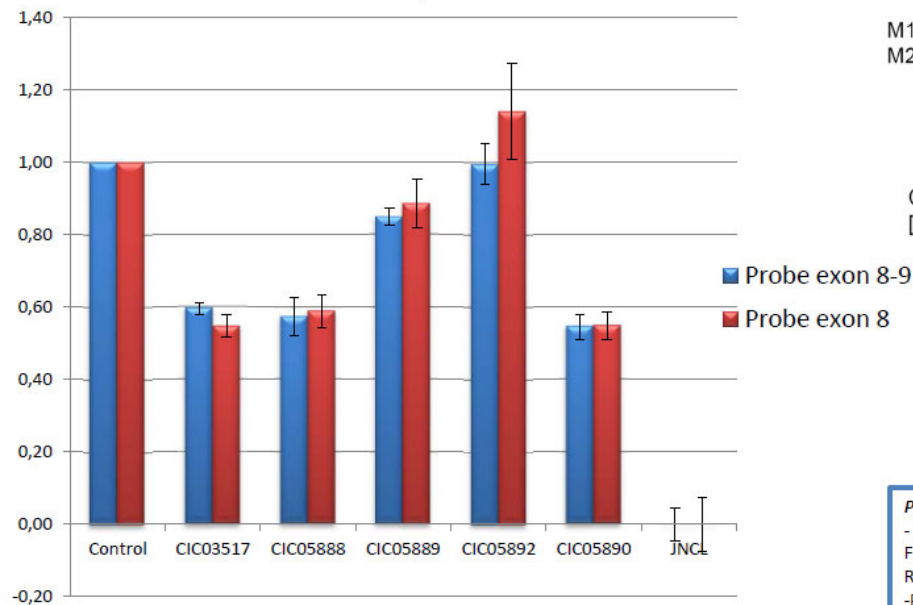

JNCL: patient homozygous for ex.8\_ex.9 1,02kb del, used as negative control

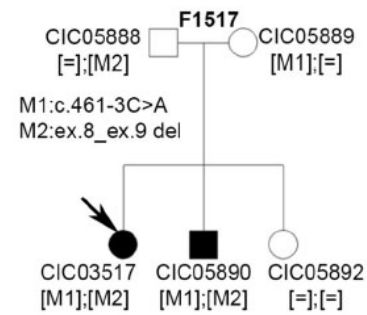

**Primers for qPCR SYBR green**

- Probe exon 8-9
  - F: TCGCTAGCATCTCATCAGGC
  - R: CCCTGGGAAGGAGAACA 153pb
- Probe exon 8
  - F: GCAGAGACATCAAGGGTGC
  - R: ATGGCCTCCTCAGTATCAGC 170pb
- Probe exon 10
  - F: AGGTAGGAGACACAGACCCT
  - R: CTGTGCTCGTCCTCAACAAG 162pb

Endogenous control: GAPDH

**eFigure 2. qPCR for ex.8\_ex.9 del in *CLN3*.** Amplification ratios from patients are compared with normal control and with JNCL patient homozygous for ex.8\_ex.9 1.02kb del. Patients CIC03517, CIC05888, CIC0589 are heterozygous for this del. Patient CIC05892 have no del.

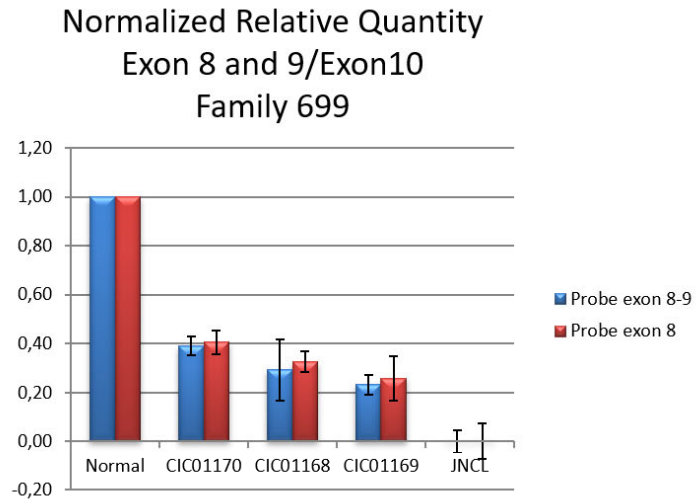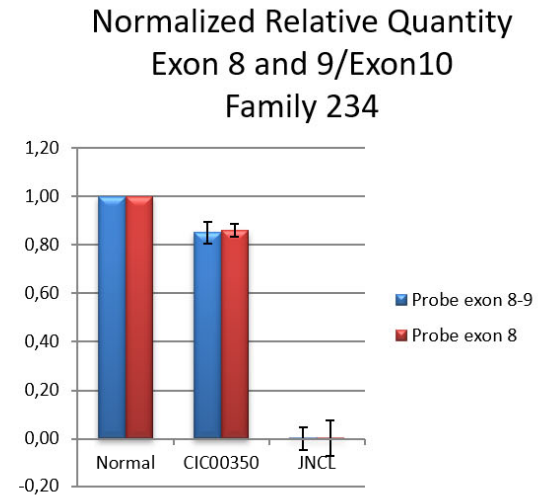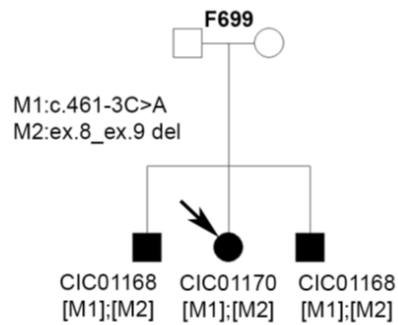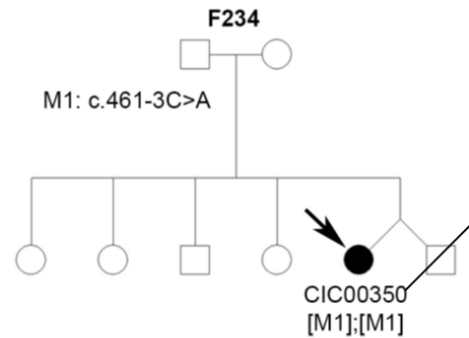

**eFigure 2(continued). qPCR for ex.8\_ex.9 del in *CLN3*.** Patient CIC01168, CIC01169, CIC01170 are heterozygous for the deletion. Patient CIC00350 have no deletion.

Normalized Relative Quantity  
Exon 8 and 9/Exon10  
Family 5662

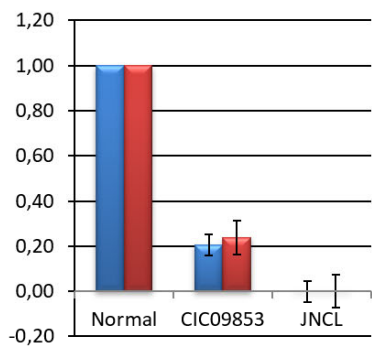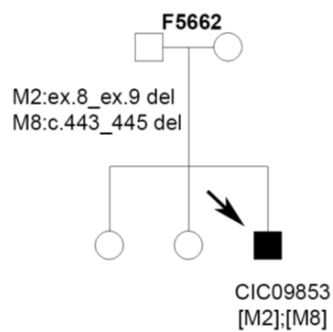

Normalized Relative Quantity  
Exon 8 and 9/Exon10  
Family 4545

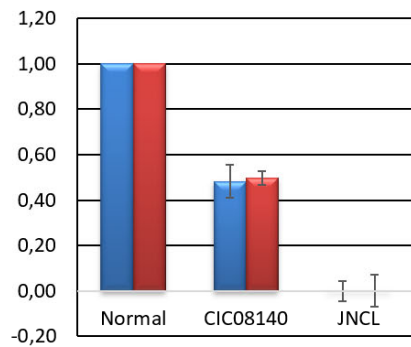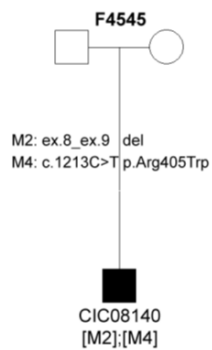

Normalized Relative Quantity  
Exon 8 and 9/Exon10  
Family 4480

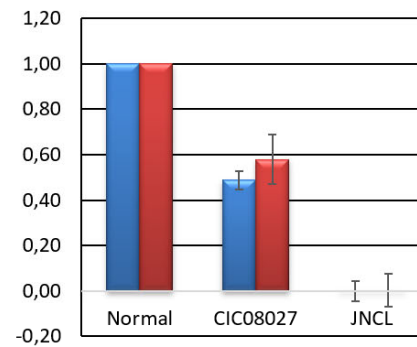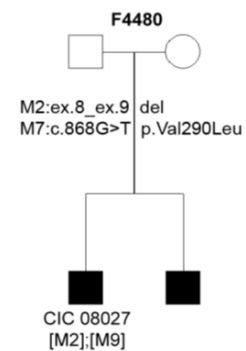

**eFigure 2 (end).** qPCR for ex.8\_ex.9 del in *CLN3*. Patients CIC09853, CIC08140, CIC08027 are heterozygous for the deletion.

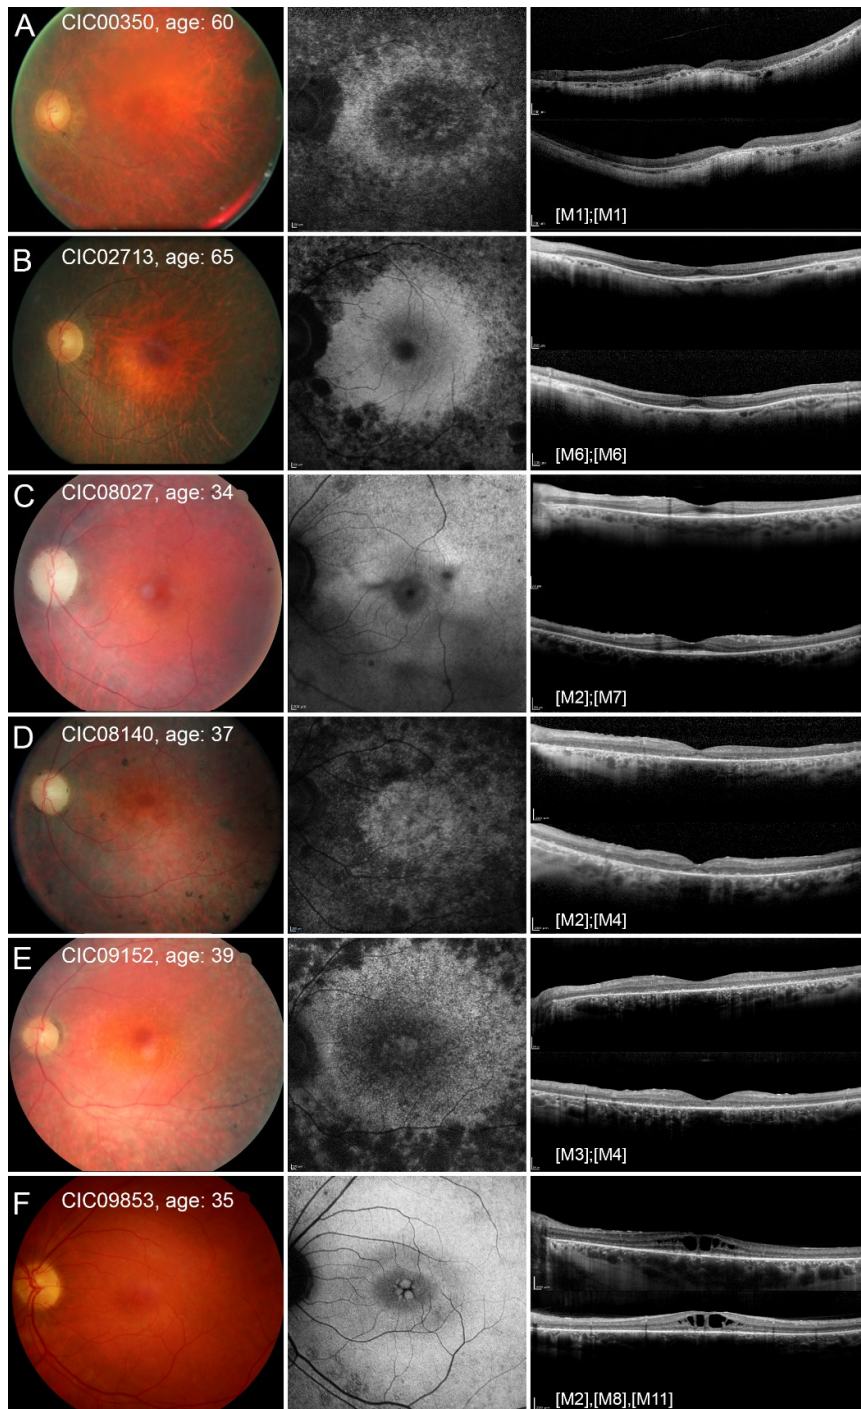

**Figure 3. Mild forms of CLN3-isolated retinal degeneration (group A).** *Fundus photo, SW-FAF, SD-OCT (Top: horizontal scan, Bottom: vertical scan).* In all cases midperipheral retina is more atrophic than the macular retina. **B**, Vascular narrowing, peripheral greyish discoloration of the retina, pigmentary migrations. Persistence of outer retinal layers in foveal zone on SD-OCT. **C**, Persistence of outer retinal layers in foveal zone on SD-OCT. Changes at the vitreo-retinal interface (striae). **D**, Waxy pallor of the optic disc, vascular attenuation and diffuse pigmentary clumping. Little island of foveal outer retina is preserved on SD-OCT. **E**, more advanced outer retinal degeneration with large ellipsoid zone disruption. **F**, intraretinal microcysts.



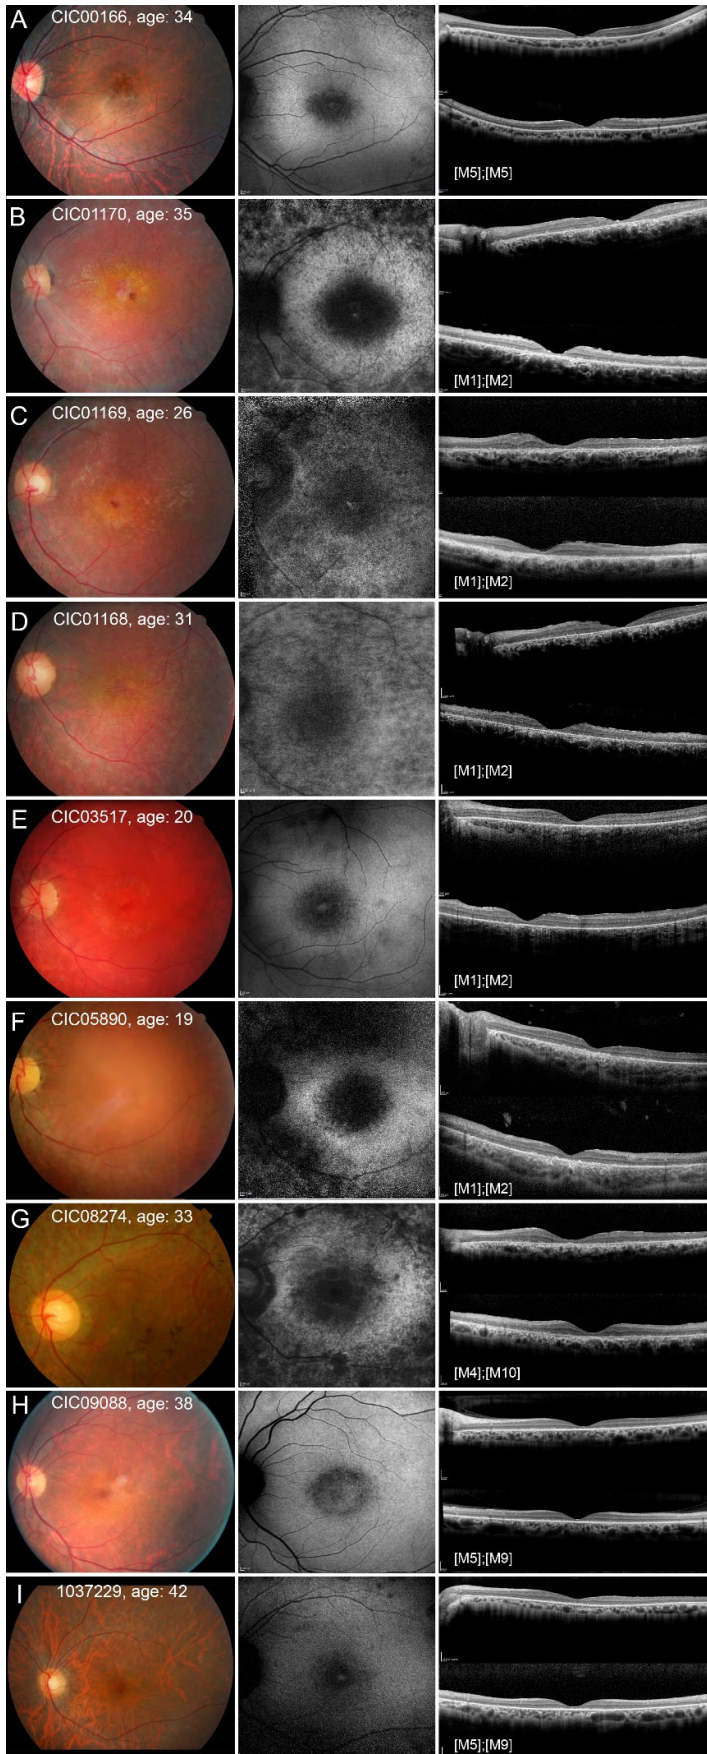

In all cases, atrophic macular changes are prominent. **A**, Only slight macular atrophic changes are seen on fundus photos and SW-FAF. However, SD-OCT reveals a widespread outer retinal layer disruption. **B,C, D**, Family F699, Retinal findings in this family are quite homogenous. Atrophic yellowish maculae with cellophane sheen, arteriolar narrowing and greyish midperipheral retina with sparse pigmentary clumping. Hypo-autofluorescent foveae circled by a broad hyper-autofluorescent ring with indistinct borders on SW-FAF. **E,F**, Family F1517, intrafamilial variability with more a severe retinal disease in CIC05890 at the same age: cataract, obvious macular and midperipheral atrophic retinal changes and waxy optic disc. **G**, Punched-out atrophic macular changes and some macular pigmentary migration as well as midperipheral retinal atrophy. **H,I**, Family F5189. Despite little atrophic macular changes seen on fundus photos and SW-FAF, outer retinal degeneration is more widespread on SD-OCT.

**eFigure 4. Severe forms of CLN3 isolated retinal degeneration (group B).** Fundus photo, SW-FAF, SD-OCT (Top: horizontal scan, Bottom: vertical scan).

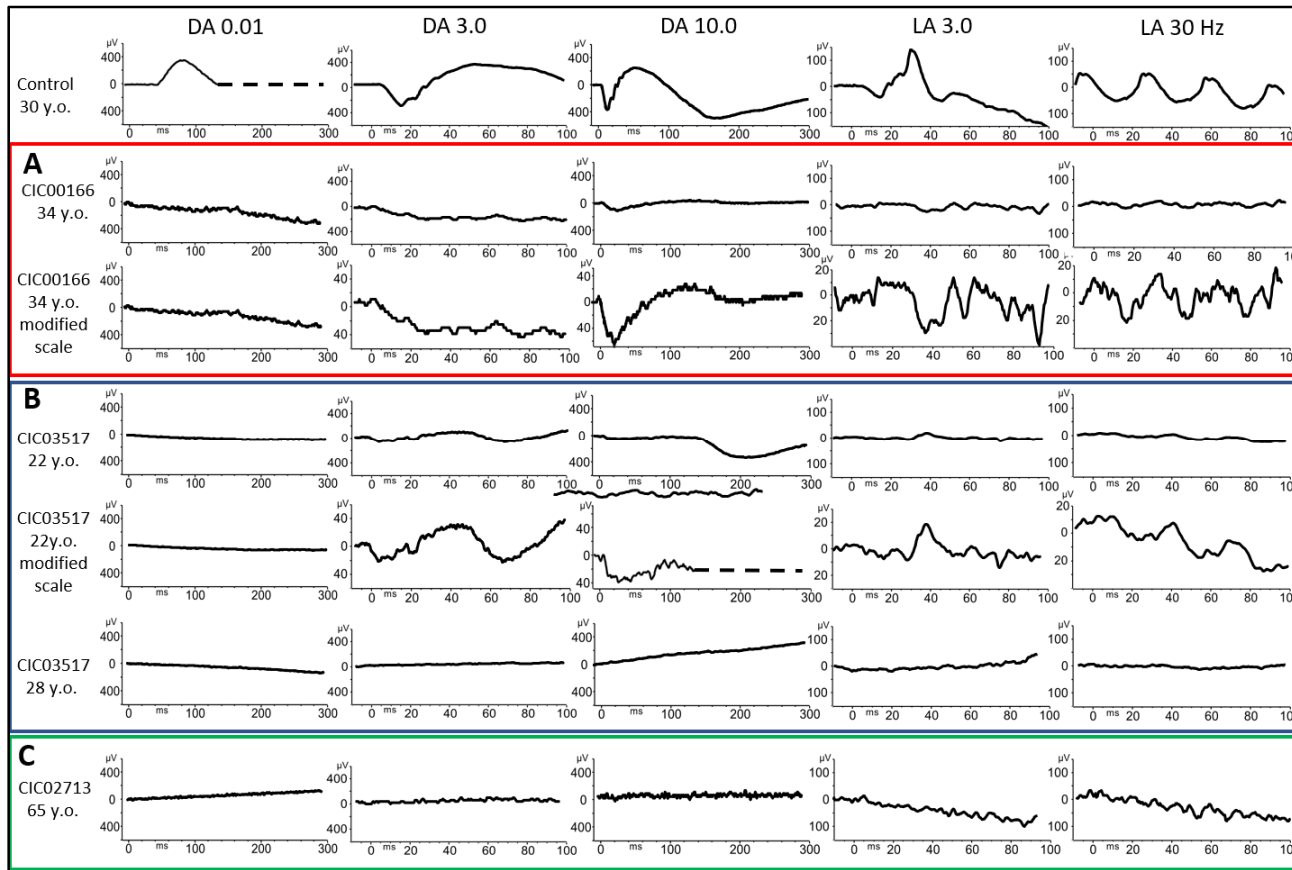

**eFigure 5. ISCEV standard full field ERG.** A, B: « severe » retinal generation (group B) patients. Undetectable responses to dim dark-adapted flash (DA 0,01). Severely reduced amplitude of the responses to a bright dark-adapted flash (DA 3,0 and DA 10,0) along with reduced b/a ratio, suggesting some degree of inner retinal dysfunction. Severely reduced responses to light-adapted stimulations (LA 3,0 and LA 30 Hz). ERG became undetectable with time. C: « mild » (group A) retinal degeneration patient. DA responses are undetectable. Residual response to the LA 30Hz flicker. Note the age of patient (mild but advanced retinopathy).

### A. Mean BCVA vs age

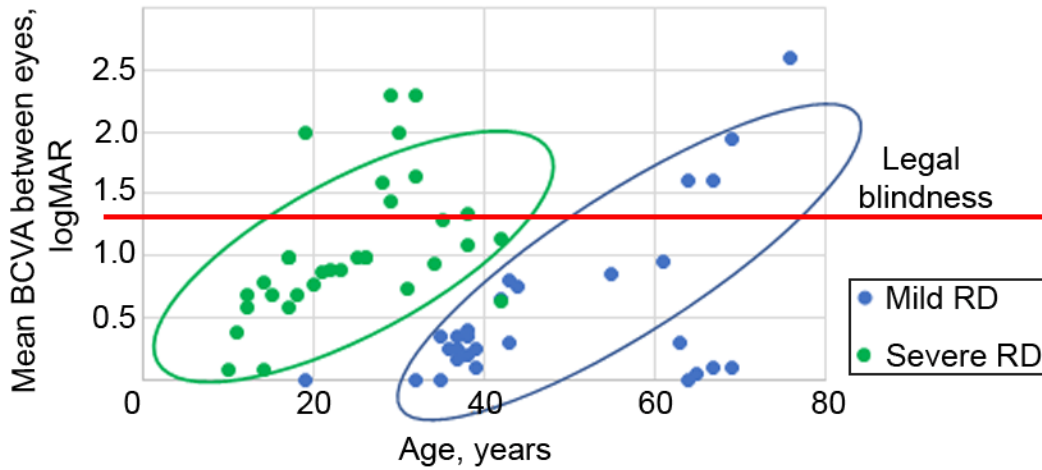

### B. Mean BCVA $\geq 1.3$ logMAR

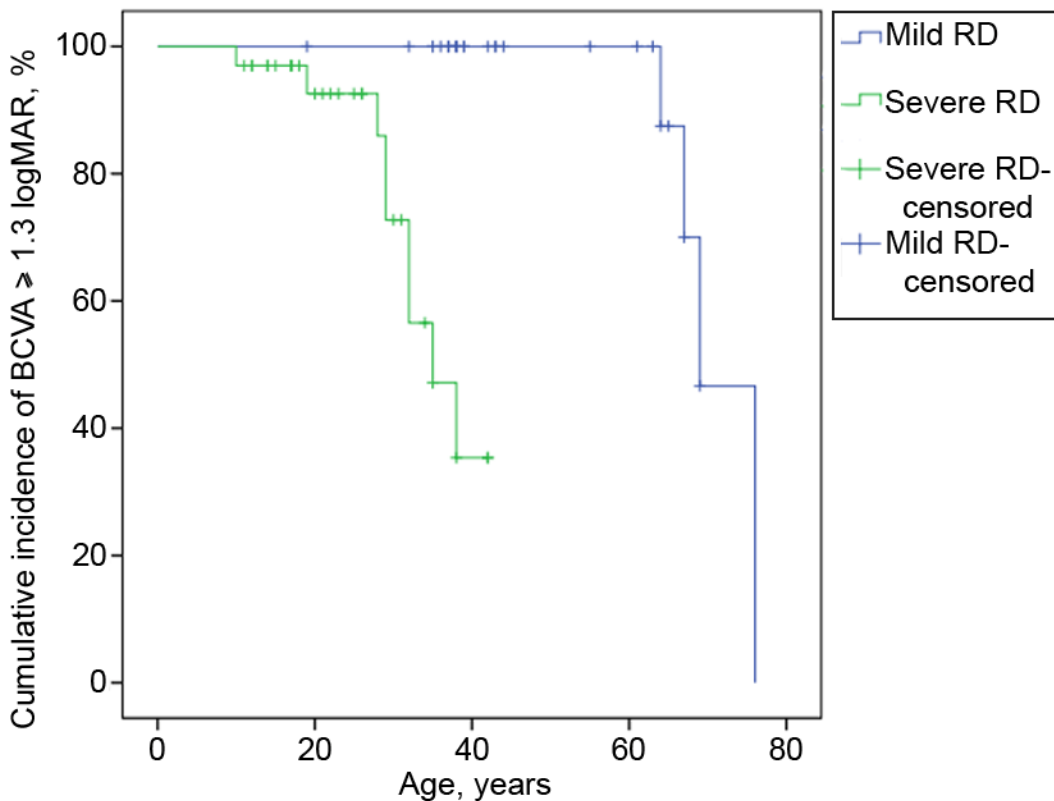

**eFigure 6. BCVA progression.** A, logMAR BCVA vs age. B, Kaplan-Meier analysis for mean BCVA between right and left eye equal or greater than 1.3 logMAR vs. age.

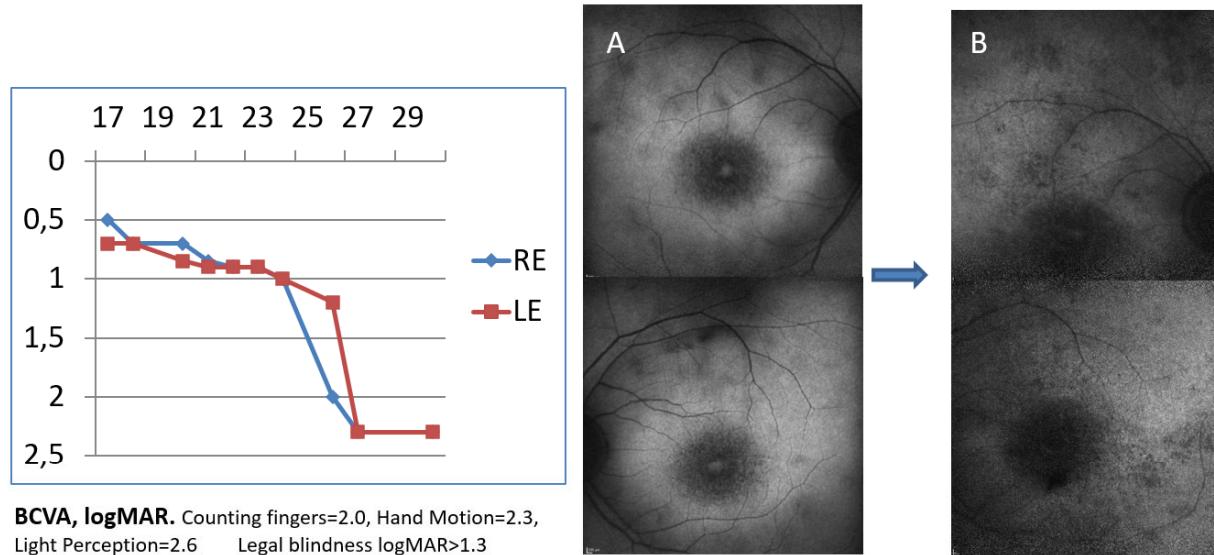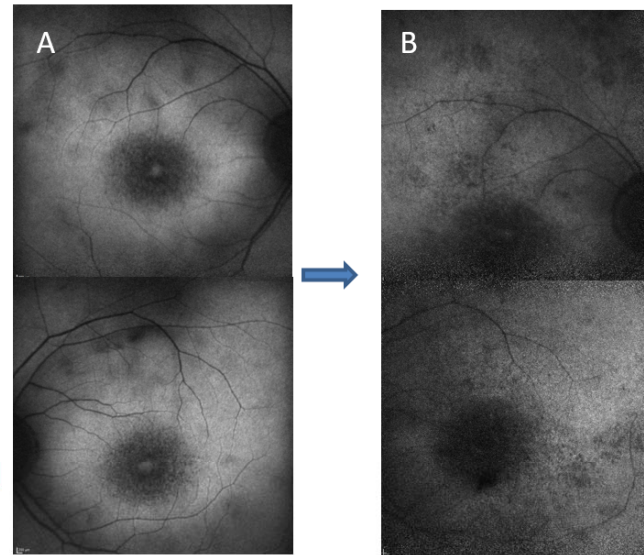

**SW-FAF.** A: 20 y.o., B: 30y.o. Progression of hypoAF spots.

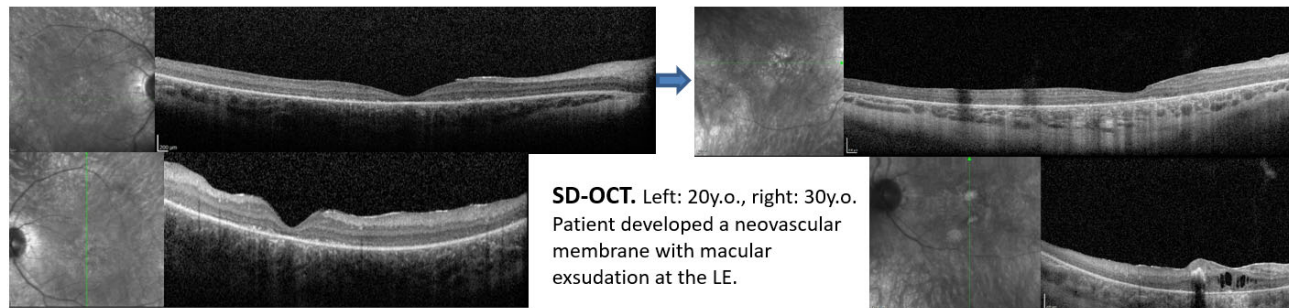

**SD-OCT.** Left: 20y.o., right: 30y.o. Patient developed a neovascular membrane with macular exudation at the LE.

**eFigure 7. CIC03517, progression: severe retinal degeneration, macular atrophy. *CLN3*: c.461-3C>G/ex.8\_ex.9del 1.02kb**

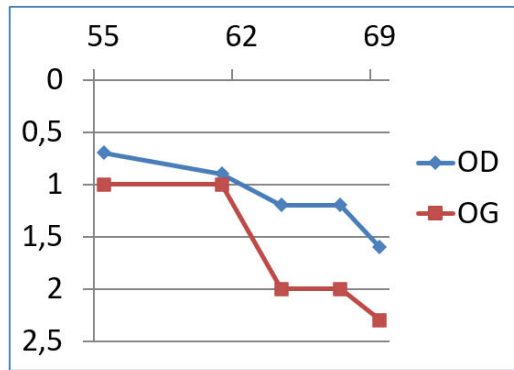

**BCVA, logMAR.** Counting fingers=2.0, Hand Motion=2.3, Light Perception=2.6; Legal blindness logMAR>1.3

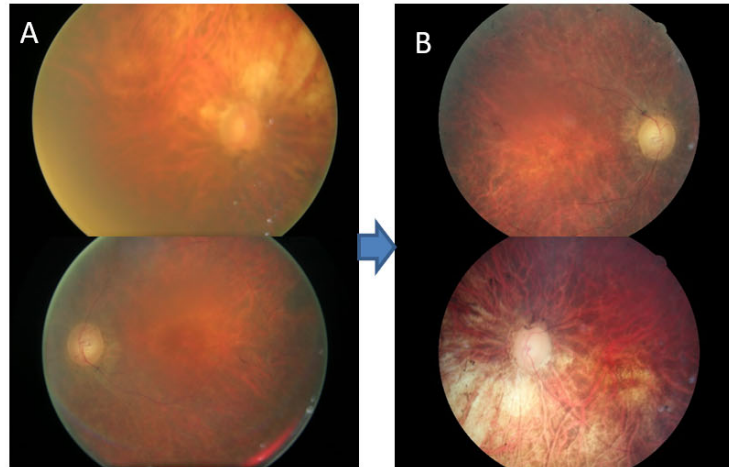

**Fundus.** Left panel: 60 y.o., right panel: 65 y.o. Cataract surgery performed at 63y.o.

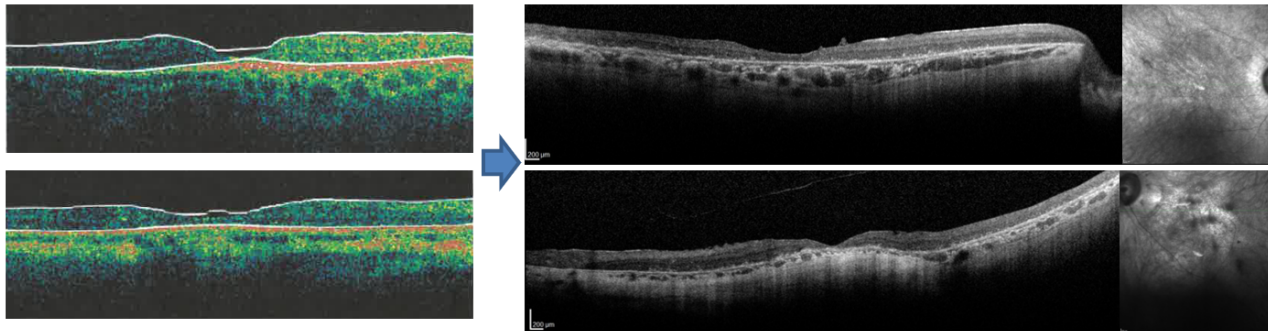

**SD-OCT.** Left: 60y.o., right: 69y.o.

**eFigure 8. CIC00350, progression: middle age-onset rod-cone dystrophy. *CLN3*: homozygous c.461-3C>A**

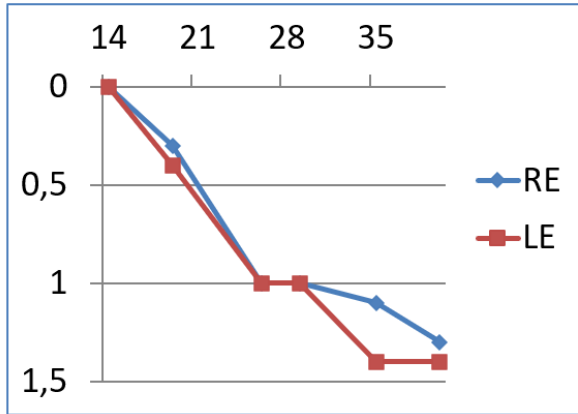

**BCVA, logMAR.** Counting fingers=2.0, Hand Motion=2.3, Light Perception=2.6. Legal blindness logMAR>1.3

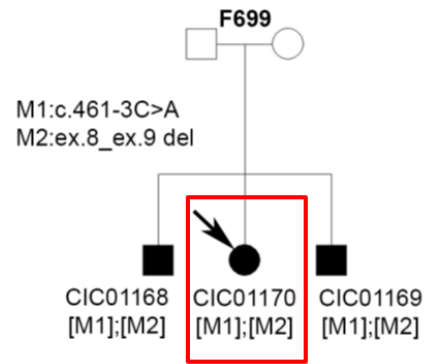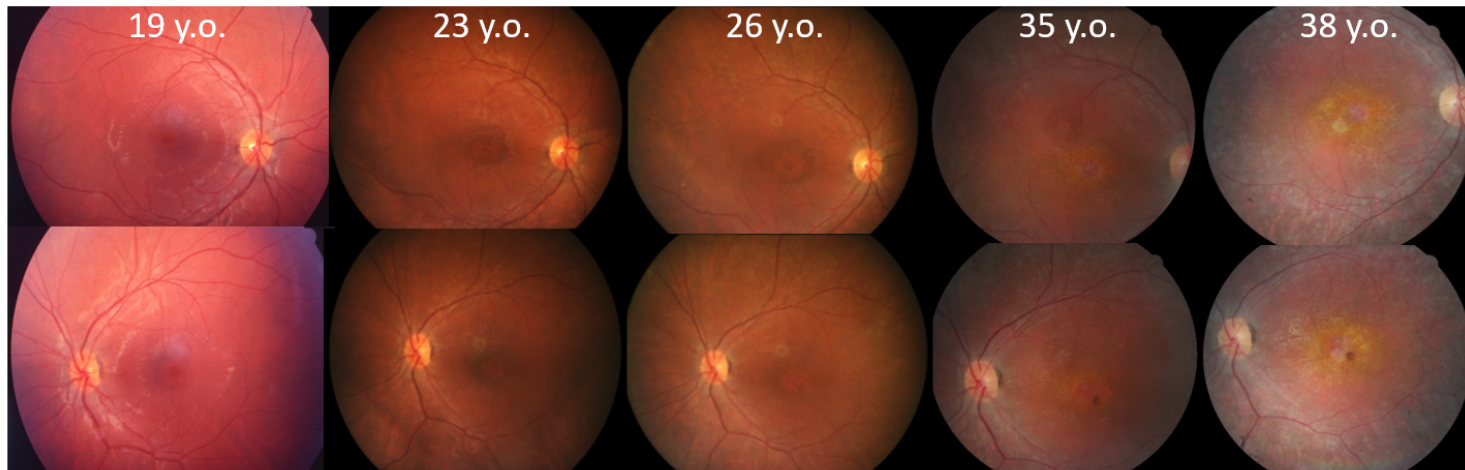

**eFigure 9. CIC01170, progression: severe retinal degeneration with early macular atrophy. *CLN3*: M1: c.461-3C>G; M2: ex.8\_ex.9del 1.02kb**

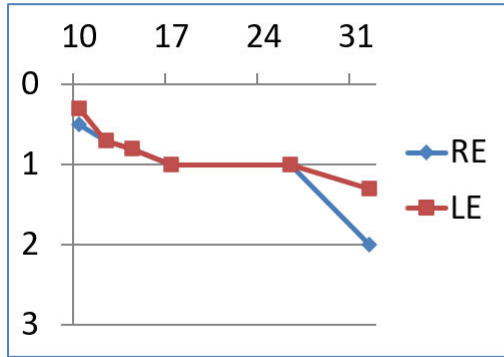

**BCVA, logMAR.** Counting fingers=2.0, Hand Motion=2.3, Light Perception=2.6    Legal blindness logMAR>1.3

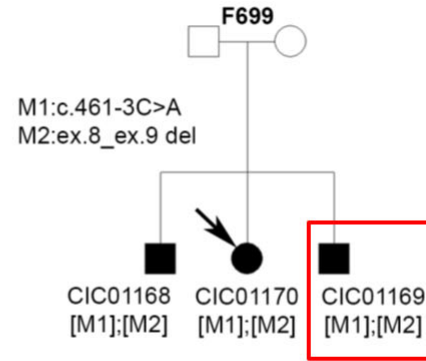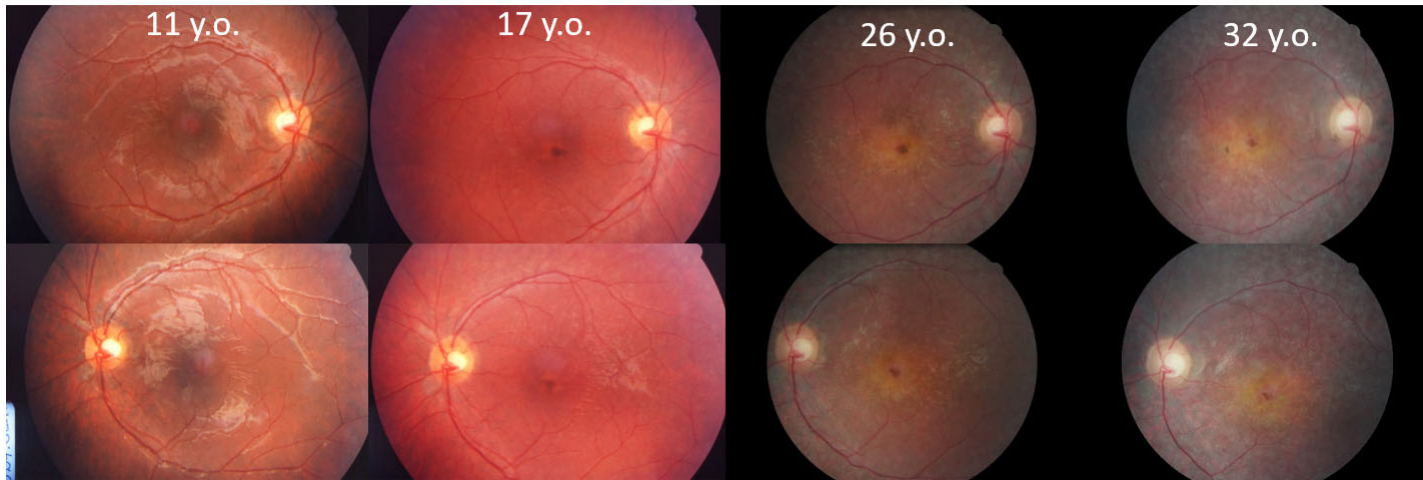

**eFigure 10. CIC01169, progression: severe retinal degeneration with early macular atrophy. *CLN3*: c.461-3C>G/ex.8\_ex.9del 1.02kb**

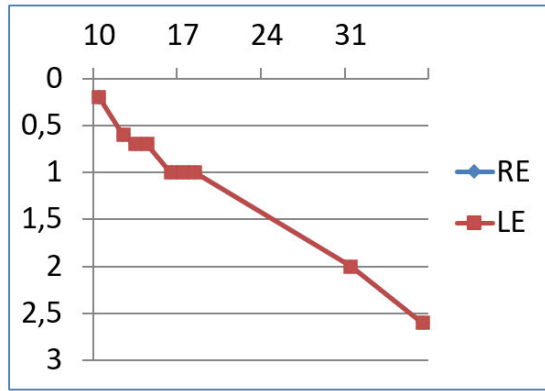

**BCVA, logMAR.** Counting fingers=2.0, Hand Motion=2.3, Light Perception=2.6 Legal blindness logMAR>1.3

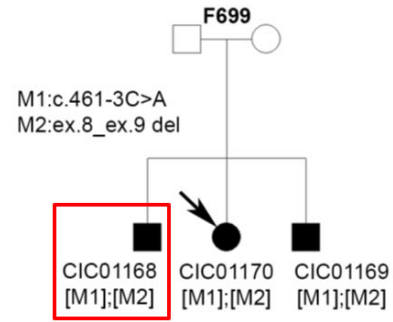

**Neuropediatric evaluation at 10 y.o.**

- Neurological examination and psycho-cognitive evaluation were normal
- MRI normal
- Bone marrow analysis normal
- No vacuolated lymphocytes

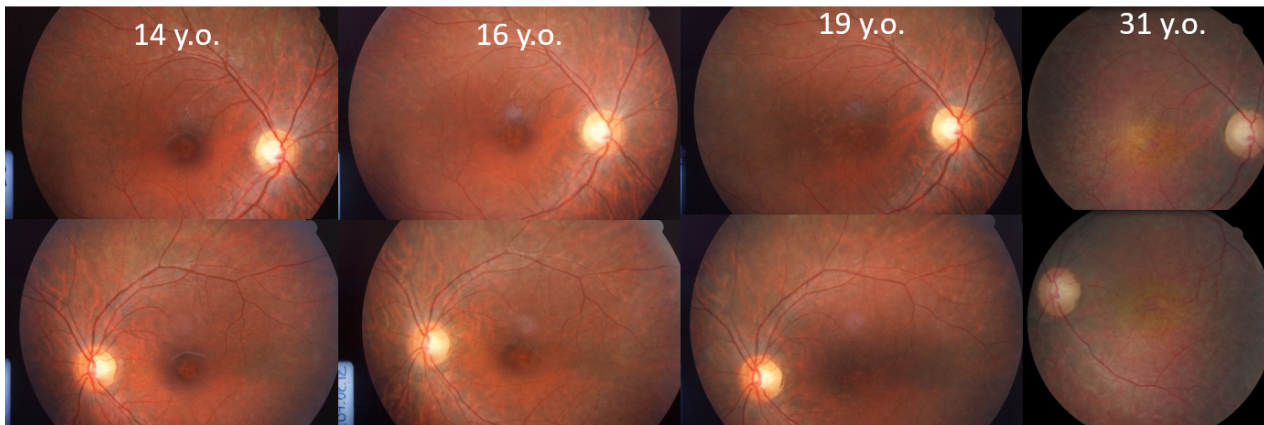

**eFigure 11. CIC01168, progression: severe retinal degeneration with early macular atrophy. *CLN3*: c.461-3C>G/ex.8\_ex.9del 1,02kb**



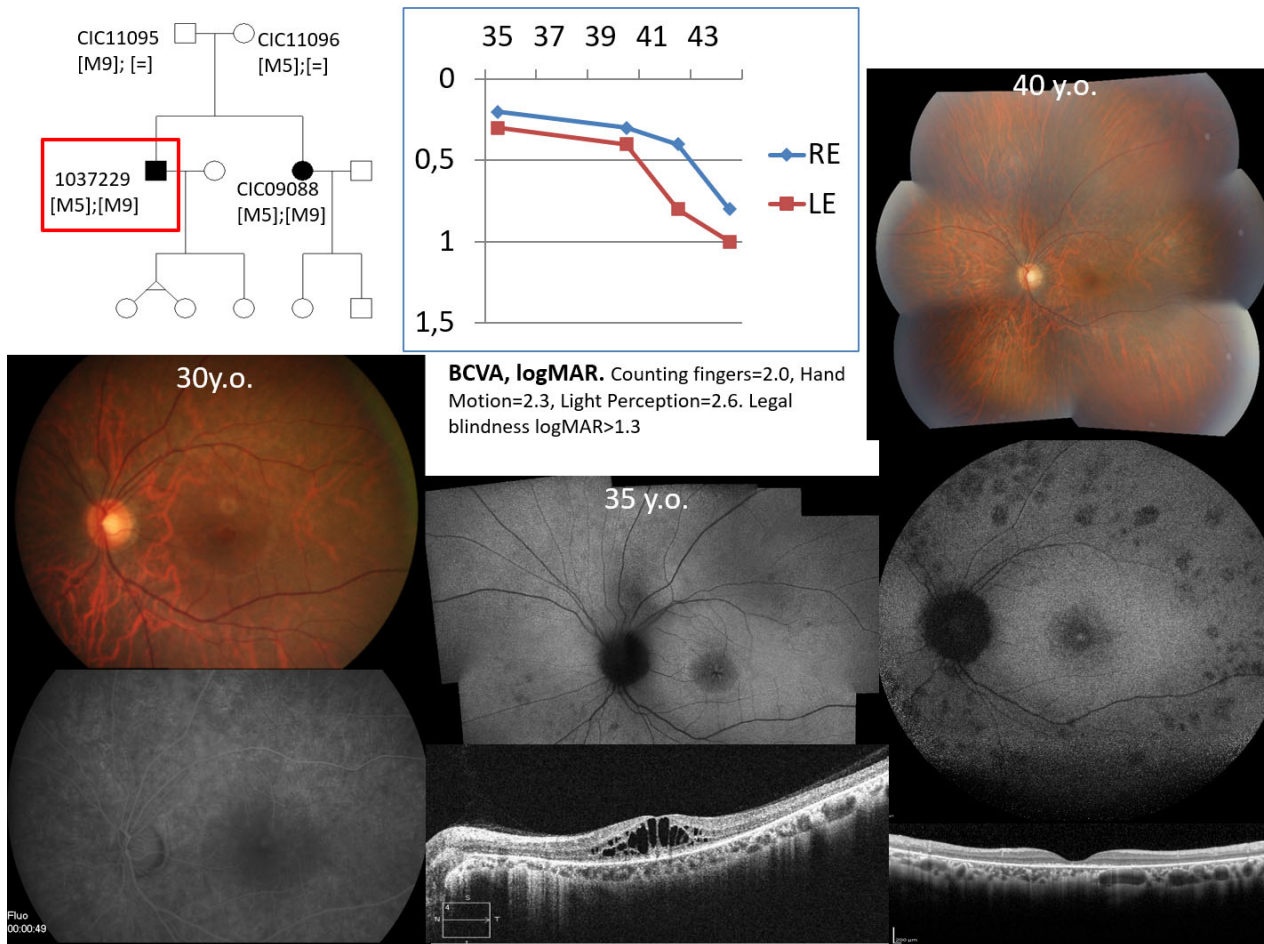

**eFigure 12. Patient 1037229, progression: severe retinal degeneration with early macular atrophy. *CLN3*: M5: c.938T>C p.Leu313Pro; M9: c.1056+3A>C**

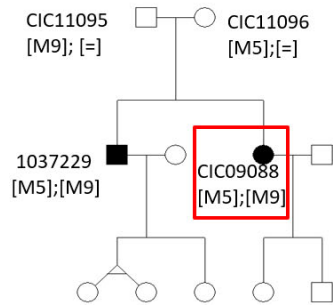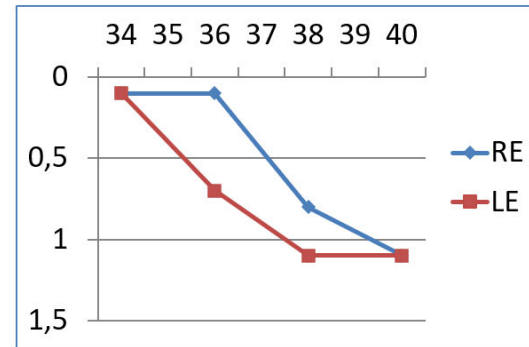

**BCVA, logMAR.** Counting fingers=2.0, Hand Motion=2.3, Light Perception=2.6. Legal blindness logMAR>1.3

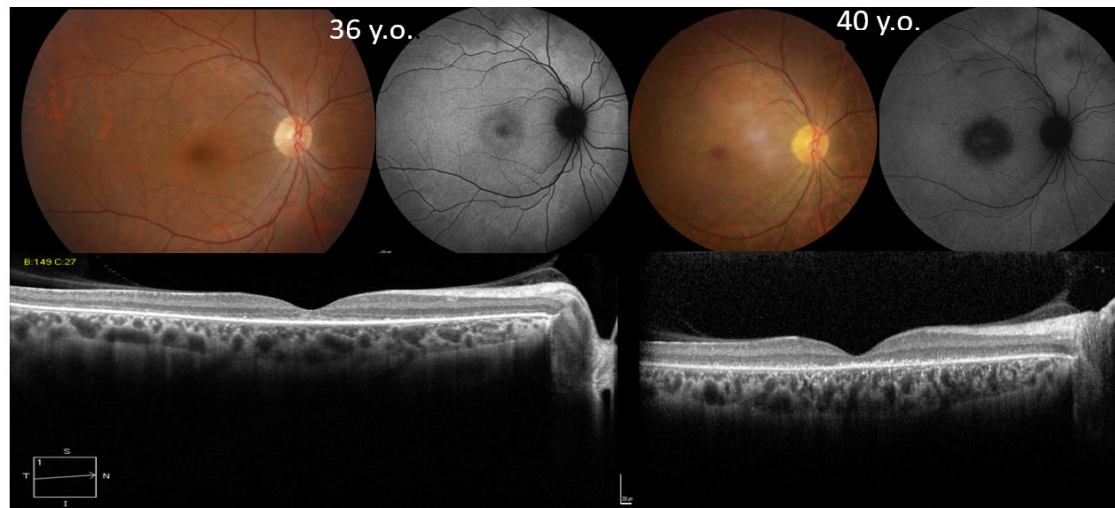

eFigure

**13. CIC09088, progression: severe retinal degeneration with early macular atrophy. *CLN3*: M5: c.938T>C p.(Leu313Pro); M9: c.1056+3A>C**

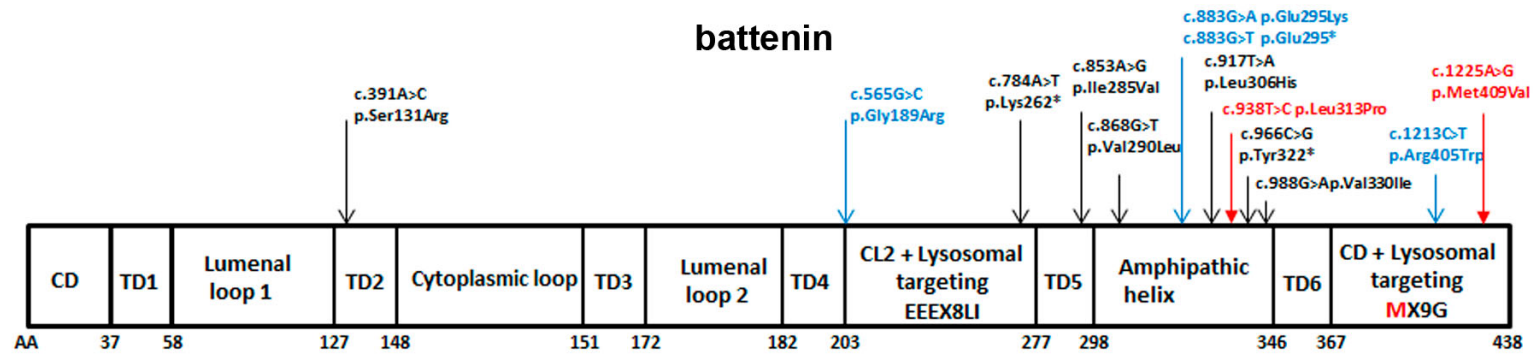

**eFigure 14. Battenin.** Missense and nonsense amino acid changes in battenin, reported in retina-restricted disease. CD, CL: cytoplasmic domain/loop, TD: transmembrane domain. In blue, variants reported in both retina restricted disease and JNCL. In red, novel variants.

**eTable. *CLN3* variants reported both in JNCL and isolated retinal degeneration.**

| JNCL<br>2 <sup>nd</sup> allele                                                                                                | Allele detected in both JNCL and non-syndromic IRD | Non-syndromic IRD<br>2 <sup>nd</sup> allele              |
|-------------------------------------------------------------------------------------------------------------------------------|----------------------------------------------------|----------------------------------------------------------|
| Ex.8_ex.9del 1.02kb <sup>5</sup>                                                                                              | c.565G>C, p.Gly189Arg <sup>5</sup>                 | c.565G>C, p.Gly189Arg <sup>6</sup>                       |
| Ex.8_ex.9del 1.02kb <sup>7</sup><br>Protracted-onset JNCL dominated by visual failure                                         | c.883G>A, p.Glu295Lys <sup>7</sup>                 | c.391A>C, p.Ser131Arg <sup>6</sup><br>cone-rod dystrophy |
| Ex.8_ex.9del 1.02kb <sup>8</sup>                                                                                              | c.883G>T, p.Glu295* <sup>8,9</sup>                 | c.917T>A, p.Leu306His <sup>10</sup>                      |
| <ul style="list-style-type: none"> <li>• c.1247A&gt;G p.Asp416Gly<sup>5</sup></li> <li>• ex.2_ex.5del<sup>11</sup></li> </ul> | c.1056+3A>C, p.? <sup>12</sup>                     | c.938T>C p.Leu313Pro<br>[this article]                   |

## References.

1. Audo I, Lancelot M-E, Mohand-Saïd S, et al. Novel C2orf71 mutations account for ~1% of cases in a large French arRP cohort. *Human Mutation*. 2011;32(4):E2091-E2103. doi:10.1002/humu.21460
2. Boulanger-Scemama E, El Shamieh S, Démontant V, et al. Next-generation sequencing applied to a large French cone and cone-rod dystrophy cohort: mutation spectrum and new genotype-phenotype correlation. *Orphanet J Rare Dis*. 2015;10. doi:10.1186/s13023-015-0300-3
3. Audo I, Bujakowska KM, Léveillard T, et al. Development and application of a next-generation-sequencing (NGS) approach to detect known and novel gene defects underlying retinal diseases. *Orphanet J Rare Dis*. 2012;7:8. doi:10.1186/1750-1172-7-8
4. Audo I, Bujakowska K, Orhan E, et al. Whole-exome sequencing identifies mutations in GPR179 leading to autosomal-recessive complete congenital stationary night blindness. *Am J Hum Genet*. 2012;90(2):321-330. doi:10.1016/j.ajhg.2011.12.007
5. Kousi M, Lehesjoki A-E, Mole SE. Update of the mutation spectrum and clinical correlations of over 360 mutations in eight genes that underlie the neuronal ceroid lipofuscinoses. *Hum Mutat*. 2012;33(1):42-63. doi:10.1002/humu.21624
6. Wang F, Wang H, Tuan H-F, et al. Next generation sequencing-based molecular diagnosis of retinitis pigmentosa: identification of a novel genotype-phenotype correlation and clinical refinements. *Hum Genet*. 2014;133(3):331-345. doi:10.1007/s00439-013-1381-5
7. Munroe PB, Mitchison HM, O'Rawe AM, et al. Spectrum of mutations in the Batten disease gene, CLN3. *Am J Hum Genet*. 1997;61(2):310-316. doi:10.1086/514846
8. Bell CJ, Dinwiddie DL, Miller NA, et al. Carrier Testing for Severe Childhood Recessive Diseases by Next-Generation Sequencing. *Science Translational Medicine*. 2011;3(65):65ra4-65ra4. doi:10.1126/scitranslmed.3001756
9. Zhong N, Moroziewicz DN, Ju W, et al. Heterogeneity of late-infantile neuronal ceroid lipofuscinosis. *Genet Med*. 2000;2(6):312-318. doi:10.1097/00125817-200011000-00002
10. Ku CA, Hull S, Arno G, et al. Detailed Clinical Phenotype and Molecular Genetic Findings in CLN3-Associated Isolated Retinal Degeneration. *JAMA Ophthalmol*. 2017;135(7):749-760. doi:10.1001/jamaophthalmol.2017.1401
11. Wright GA, Georgiou M, Robson AG, et al. Juvenile Batten Disease (CLN3): Detailed Ocular Phenotype, Novel Observations, Delayed Diagnosis, Masquerades, and Prospects for Therapy. *Ophthalmology Retina*. Published online November 2019:S2468653019306293. doi:10.1016/j.oret.2019.11.005
12. Lojewski X, Staropoli JF, Biswas-Legrand S, et al. Human iPSC models of neuronal ceroid lipofuscinosis capture distinct effects of TPP1 and CLN3 mutations on the endocytic pathway. *Hum Mol Genet*. 2014;23(8):2005-2022. doi:10.1093/hmg/ddt596
